# Supplementary material for: Novel small molecules potentiate premature termination codon readthrough by aminoglycosides
Source: PubMed Central journal article supplement — Nucleic Acids Res. 2016 Jul 12;44(14):6583–98. doi: 10.1093/nar/gkw638 (PMC5001621; doi:10.1093/nar/gkw638), 2016-07-12
Supplement: supp_gkw638_nar-01402-v-2016-File009.pdf [file supp_gkw638_nar-01402-v-2016-File009.pdf]

## Supplementary Materials

Supplementary Figure S1. Synergistic suppression of *met8-1*, *trp5-48* and *lys2-101* nonsense alleles by CDX compounds and paromomycin.

Supplementary Figure S2. p53 PTC readthrough in HDQ-P1 cells.

Supplementary Figure S3. PTC readthrough in HDQ-P1 cells produces transcriptionally active p53.

Supplementary Figure S4. PTC readthrough at p53 R213X (TGA-C) in a cell-free translation extract.

Supplementary Figure S5. Effect of CDX5-1 and G418 on cell viability.

Supplementary Table S1. Nonsense mutations in B0133-3B and IS110-18A strains identified by whole genome sequencing.

Supplementary Table S2. Structure and p53 R213X readthrough activity of CDX5 analogs.

Supplementary Table S3. Primers used in this study.
